# Supplementary material for: Dye-Doped Polymeric Microplastics: Light Tools for Bioimaging in Test Organisms
Source: MDPI journal article supplement (doi:10.3390/polym15153245), 2023-07-30

# Supplementary Materials

## Dye-Doped Polymeric Microplastics: Light Tools for Bioimaging in Test Organisms

Federica Bertelà <sup>1</sup>, Chiara Battocchio <sup>1</sup>, Giovanna Iucci <sup>1</sup>, Simona Ceschin <sup>1,2</sup>, Dario Di Lernia <sup>1</sup>, Flaminia Mariani <sup>1</sup>, Andrea Di Giulio <sup>1,2</sup>, Maurizio Muzzi <sup>1</sup> and Iole Venditti <sup>1,\*</sup>

<sup>1</sup> Department of Sciences, Roma Tre University, via della Vasca Navale 79, 00146 Rome, Italy; federica.bertela@uniroma3.it (F.B.); chiara.battocchio@uniroma3.it (C.B.); giovanna.iucci@uniroma3.it (G.I.); simona.ceschin@uniroma3.it (S.C.); dar.dilernia@stud.uniroma3.it (D.D.L.); flaminia.mariani@uniroma3.it (F.M.); andrea.digiulio@uniroma3.it (A.D.G.); maurizio.muzzi@uniroma3.it (M.M.); iole.venditti@uniroma3.i (I.V.)  
<sup>2</sup> NBFC, National Biodiversity Future Center, 90133 Palermo, Italy  
 \* Correspondence: iole.venditti@uniroma3.it

**Table S1.** Experimental conditions and SEM image of polymeric particles obtained by OBM, using polymer dissolved in solvent (acetone or DMF), put 7 mL in dialysis membrane and immersed in 200 mL of distilled water for 5 days, at room temperature (25°C).

| P(S-co-MMA) (g) | acetone (10 mL)                                                                     | DMF (10 mL)                                                                           |
|-----------------|-------------------------------------------------------------------------------------|---------------------------------------------------------------------------------------|
| 0.0530          | 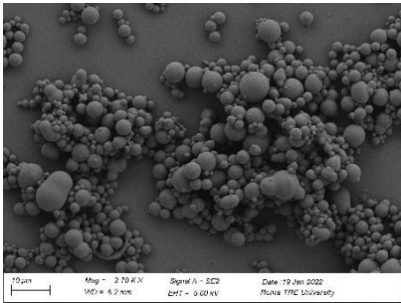 |   |
| 0.3015          |  |  |

**Table S2.** Experimental conditions and SEM image of polymeric particles obtained by OBM, using different amount of polymer dissolved with different amount of dye (RITC or FITC) in different volume of acetone, put in dialysis membrane and immersed in 200 mL of distilled water for 5 days, at room temperature (25°C).

| P(S-co-MMA)<br>(g) | Acetone<br>(mL) | RITC    |                                                                                                                                                                                                                                                             | FITC    |                                                                                                                                                                                                                                                              |
|--------------------|-----------------|---------|-------------------------------------------------------------------------------------------------------------------------------------------------------------------------------------------------------------------------------------------------------------|---------|--------------------------------------------------------------------------------------------------------------------------------------------------------------------------------------------------------------------------------------------------------------|
| 0.300              | 10              | 0.003 g | 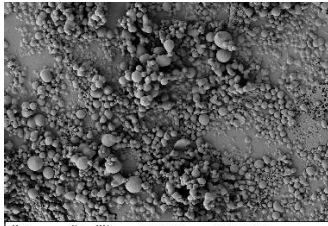                                                                                        | 0.003mg |    |
|                    |                 | 0.030 g |    | 0.030 g |                                                                                    |
| 3.000 g            | 100             | 0.003mg |                                                                                       | -       | -                                                                                                                                                                                                                                                            |

**Table S3.** Spectra were collected at C1s, N1s, S2p and O1s core levels (all BE (eV), FWHM (eV), atomic percentages and proposed signals assignments are here reported.

| SAMPLE               | SIGNAL             | BE (eV) | FWHM (eV) | Atomic % (exp) | ASSIGNMENT     |
|----------------------|--------------------|---------|-----------|----------------|----------------|
| RITC + microplastics | C1s                | 285     | 1.8       | 37%            | C-C, C=C       |
|                      |                    | 286.5   | 1.8       | 13%            | CN, NCS        |
|                      |                    | 288.1   | 1.8       | 25%            | C-O, C=O       |
|                      |                    | 289.8   | 1.8       | 17%            | COOH           |
|                      | N1s                | 398.4   | 1.7       | 7%             | NCS            |
|                      |                    | 399.9   | 1.7       | 75%            | amine          |
|                      |                    | 401.1   | 1.7       | 18%            | N <sup>+</sup> |
|                      | S2p 3/2            | 161.4   | 2.6       | 56%            | NCS            |
|                      |                    | 164.2   | 2.6       | 15%            | SS, SH         |
|                      |                    | 168.6   | 2.6       | 29%            | oxidized S     |
| FITC + microplastics | C1s                | 285.0   | 1.8       | 38%            | C-C            |
|                      |                    | 286.6   | 1.8       | 13%            | CN, NCS        |
|                      |                    | 287.7   | 1.8       | 26%            | C-O, C=O       |
|                      |                    | 289.0   | 1.8       | 14%            | COOH           |
|                      | N1s                | 398.8   | 1.8       | 7%             | NCS            |
|                      |                    | 400.3   | 1.8       | 74%            | amine          |
|                      |                    | 401.6   | 1.8       | 19%            | N <sup>+</sup> |
|                      | S2p <sub>3/2</sub> | 160.8   | 3.0       | 13%            | NCS            |
|                      |                    | 164.0   | 3.0       | 57%            | SH, S-S        |
|                      |                    | 168.9   | 3.0       | 22%            | oxidized S     |
|                      |                    | 172.2   | 3.0       | 8%             | oxidized S     |

**Figure S1.** Calibration curves for RITC (a) and FITC (b).

(a)

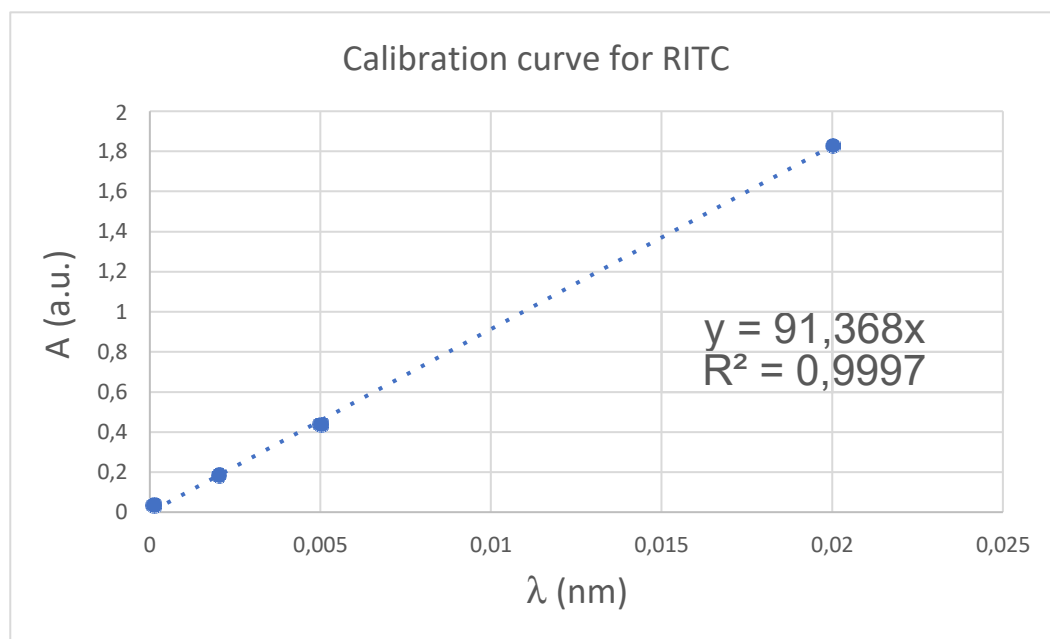

(b)

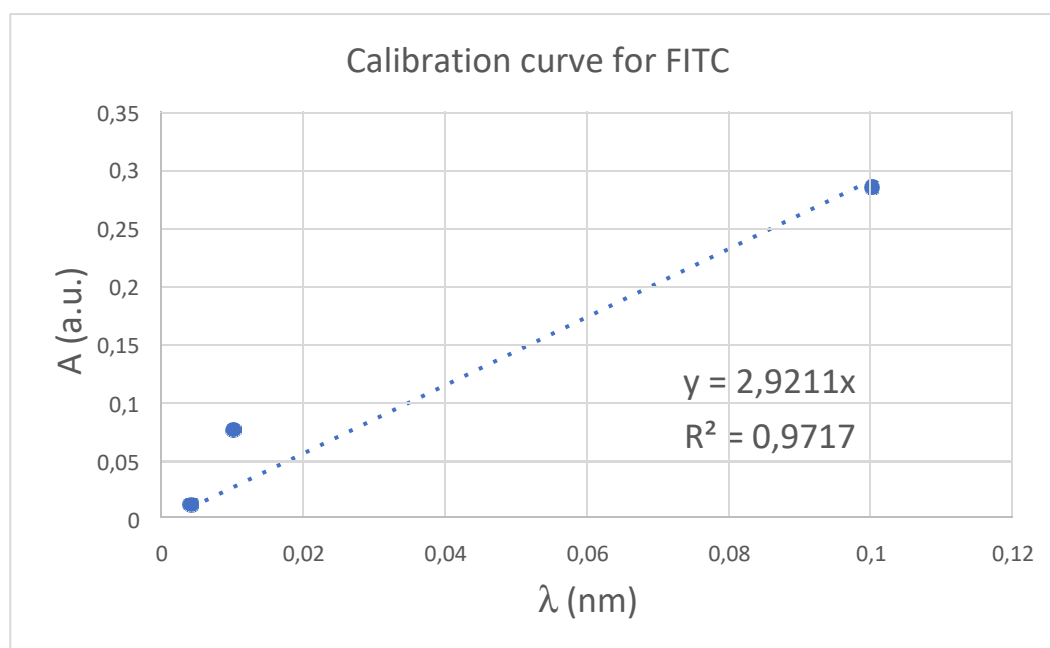

Supplement: s1 [file s1]
